# Supplementary material
Source: publisher site journal article supplement (https://www.dovepress.com/article/248692)
Supplement: Supplementary file 1 [file get_supplementary_file.php]

**Supplementary Materials**

**
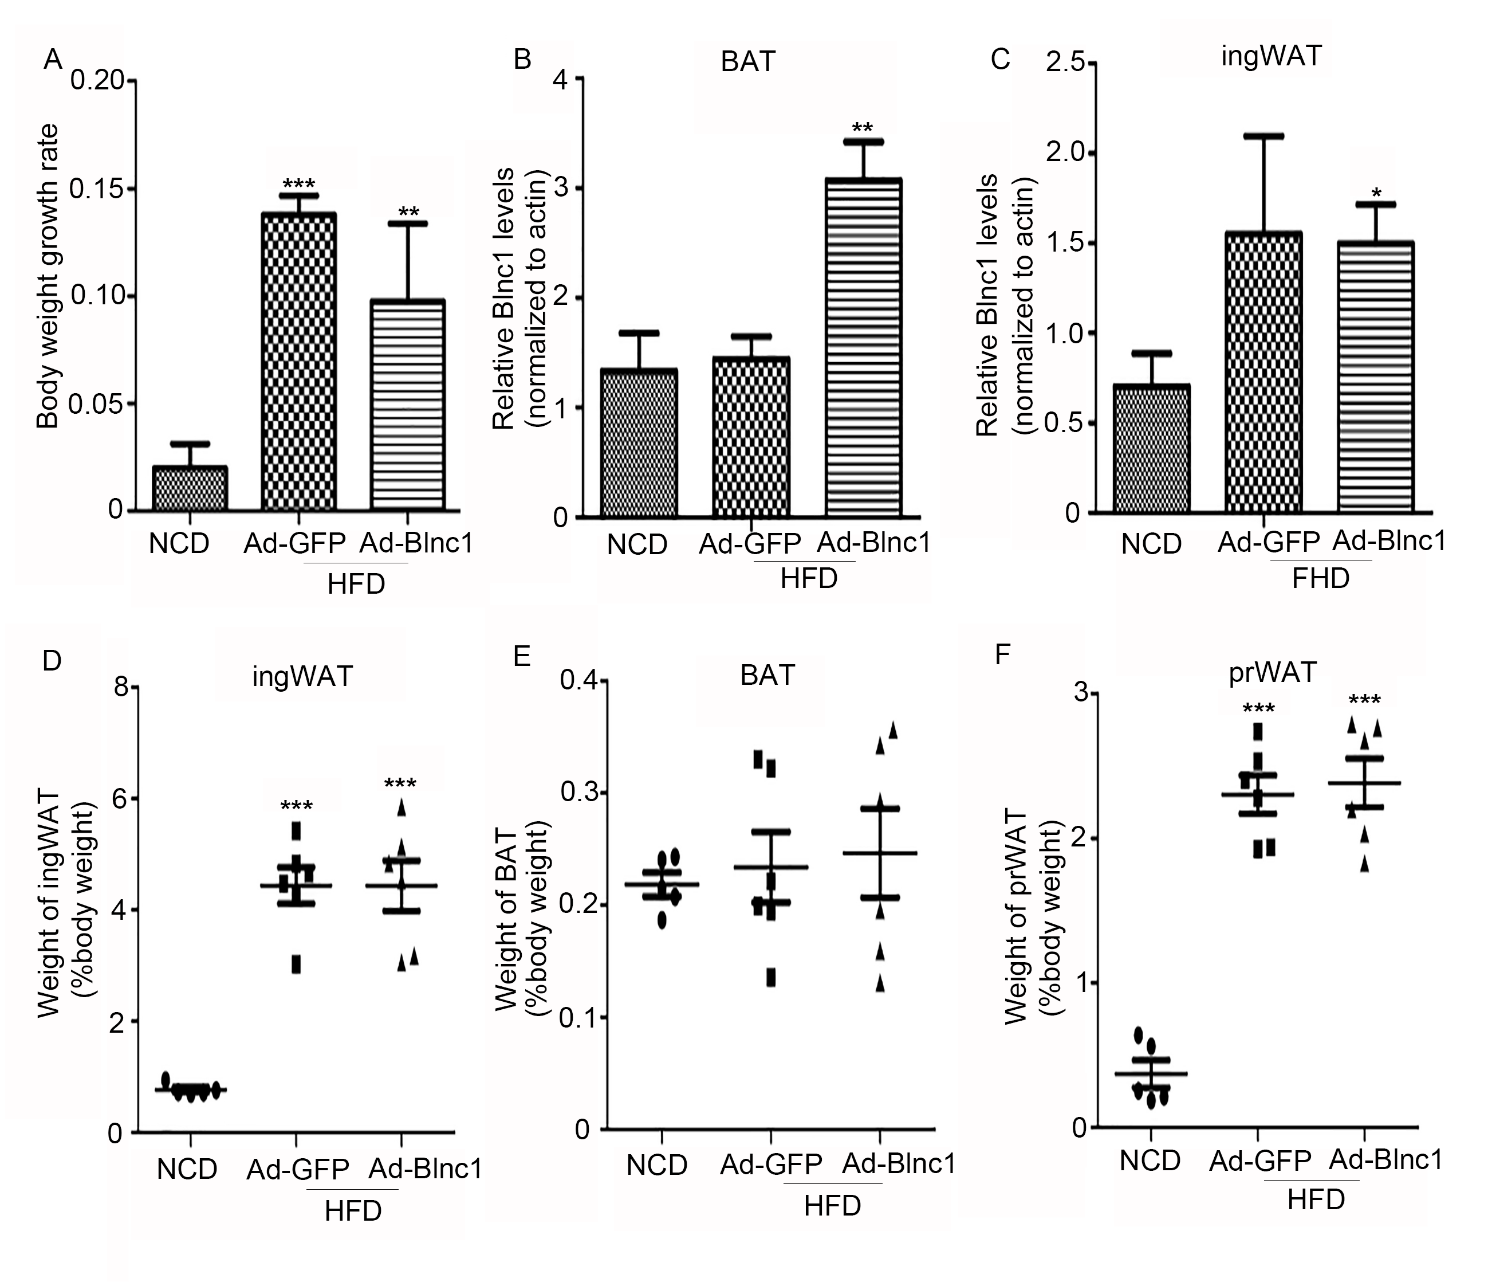
**

**Fig S1**. (A) body weight growth rate (%); Blnc1 expression in BAT (B) and ingWAT (C) following infection with Ad-GFP or Ad-Blnc1; (D) ingWAT /body weight (%); (E) BAT /body weight (%); (F) prWAT /body weight (%). *p < 0.05, **p < 0.01, ***p < 0.001; NCD *vs*. HFD-Ad-GFP groups (n = 5).


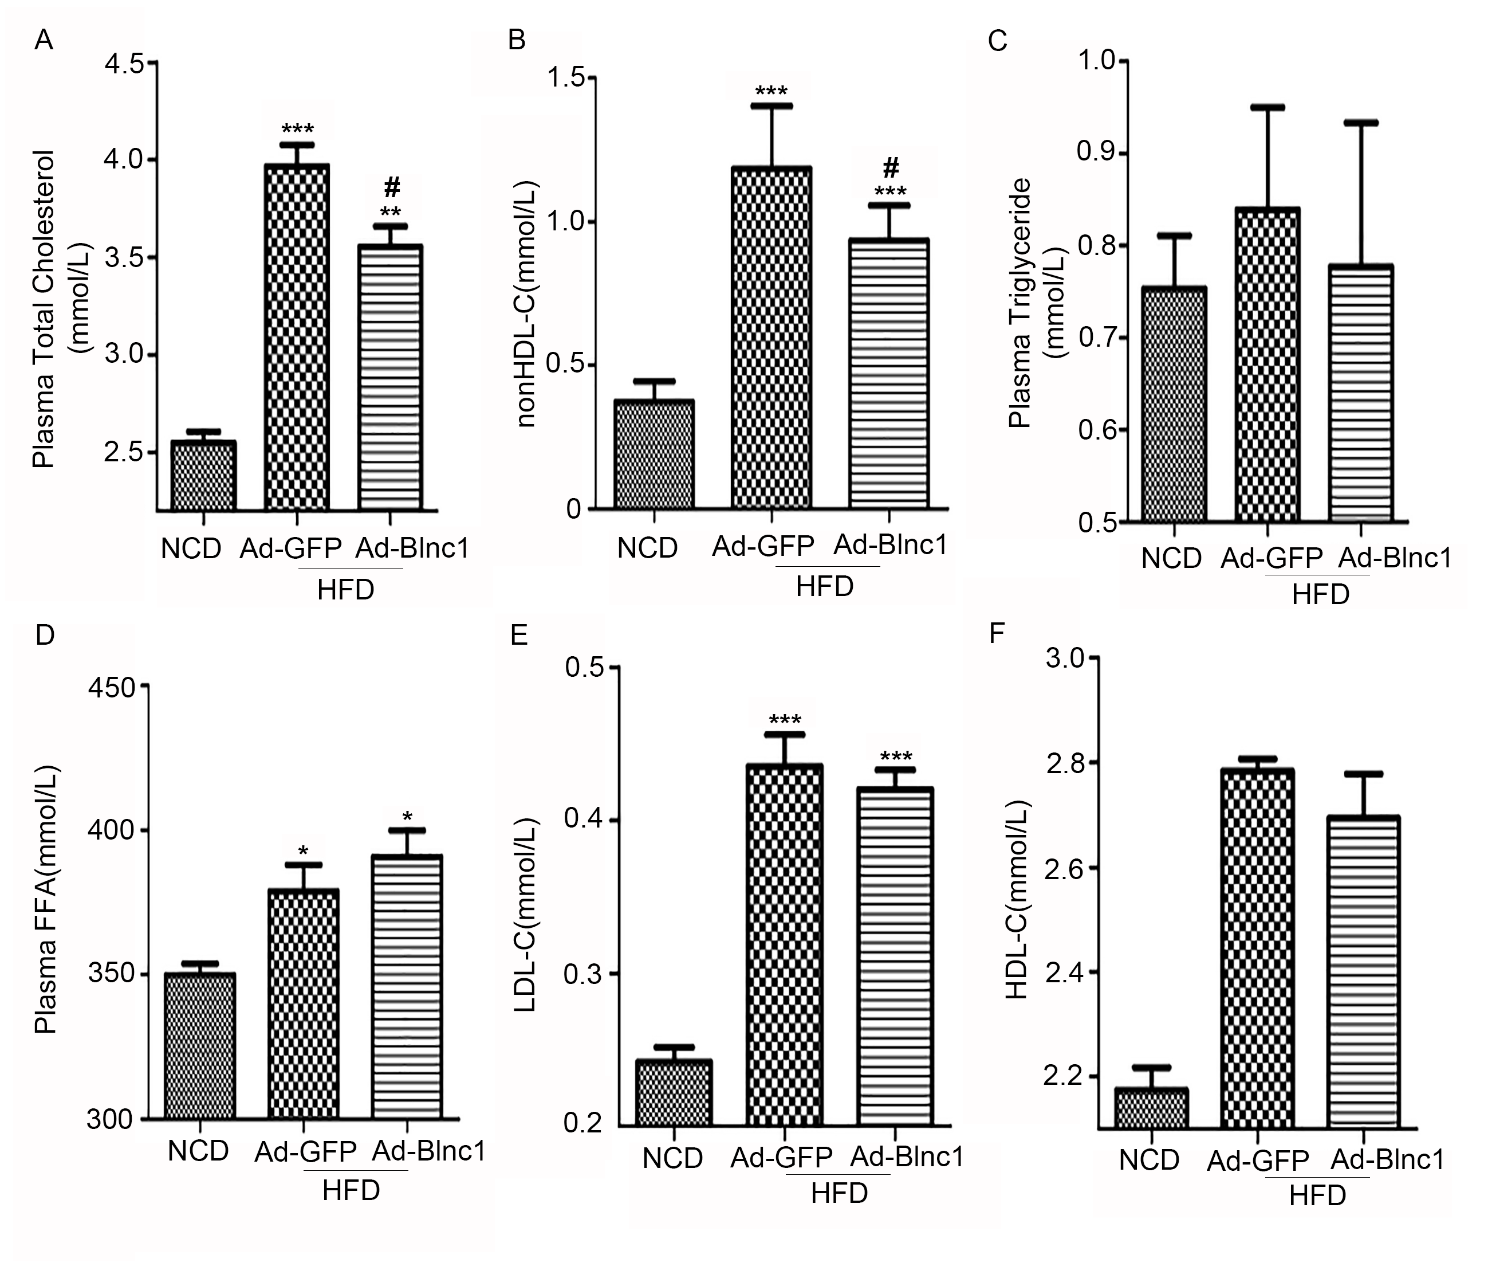


**Fig S2**. (A–C) Plasma total cholesterol, nonHDL-c and triglyceride concentrations and (D–F) serum FFA, LDL-c, HDL-c levels. *p < 0.05, **p < 0.01, ***p < 0.001, NCD *vs*. HFD-Ad-GFP groups; #p < 0.05, HFD-Ad-GFP *vs*. HFD-Ad-Blnc1 groups (n = 5).


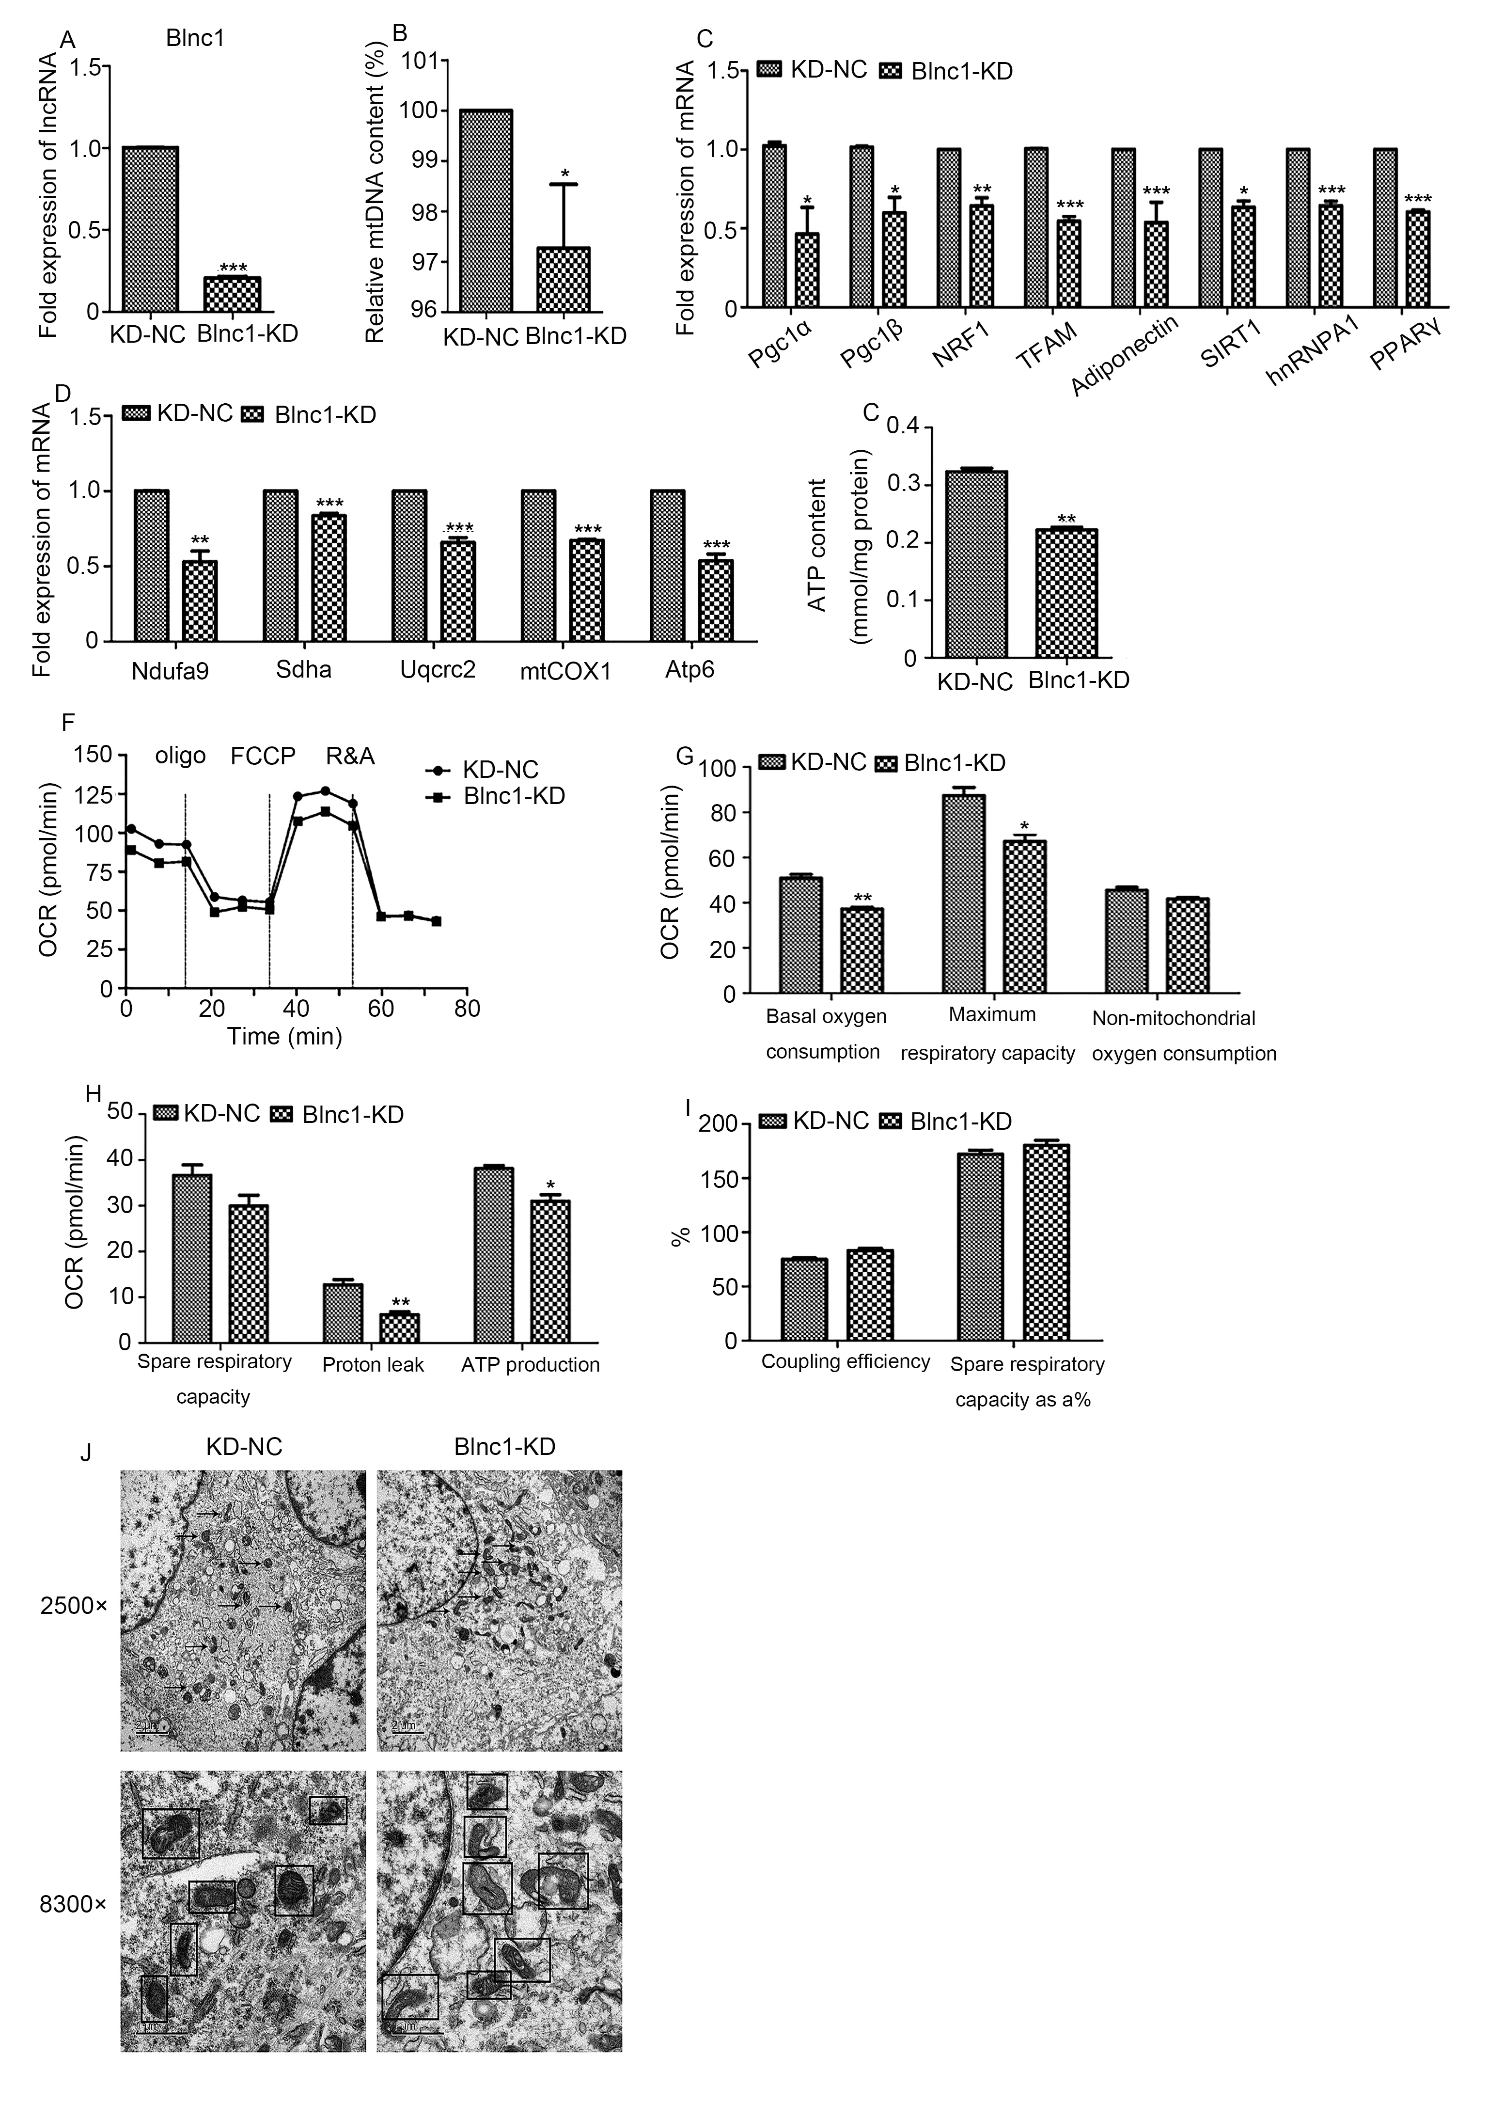


**Fig S3**. (A) mRNA level of Blnc1 following treatment with KD-NC or Blnc1-KD lentivirus; (B) mtDNA content of 3T3-L1 pre-adipocytes; (C, D) expression of genes related to mitochondrial biogenesis and function by qRT-PCR; (E) ATP content; and (F – I) OCR. Arrows indicate injection of the respiratory inhibitors oligomycin (Oligo), FCCP, and rotenone and antimycin (R&A). (J) Representative TEM images of the mitochondrial ultrastructure of KD-NC and Blnc1-KD cells. Black arrows and squares indicate mitochondria. Scale bars = 2, 1 μm. *p < 0.05, **p < 0.01, ***p < 0.001, KD-NC *vs*. Blnc1-KD groups.
